# Supplementary material for: Vitamin C regulates skeletal muscle post-injury regeneration by promoting myoblast proliferation through its direct interaction with the Pax7 protein
Source: Royal Society of Chemistry journal article supplement (doi:10.1039/d3fo03938b), 2024-01-01
Supplement: d3fo03938b1.pdf [file d3fo03938b1.pdf]

Supplementary Table 1 - All reagents in this experiment

| Reagent                                               | Corporation                                           | Origin           |
|-------------------------------------------------------|-------------------------------------------------------|------------------|
| C2C12 cell                                            | Procell                                               | Wuhan, China     |
| HEK293T cell                                          | Procell                                               | Wuhan, China     |
| L-Ascorbic acid                                       | Sigma-Aldrich                                         | Shanghai, China  |
| Dulbecco's modified Eagle's medium (DMEM)             | SparkJade                                             | Shandong, China  |
| Fetal bovine serum (FBS)                              | VivaCell BIOSCIENCES                                  | Shanghai, China  |
| Horse serum (HS)                                      | VivaCell BIOSCIENCES                                  | Shanghai, China  |
| Trizol                                                | SparkJade                                             | Shandong, China  |
| Ethanol                                               | FUYU CHEMICAL                                         | Tianjin, China   |
| BeyoClick EdU-594 cell proliferation assay kit        | Beyotime Biotechnology                                | Shanghai, China  |
| Cell cycle and apoptosis detection kit                | Beyotime Biotechnology                                | Shanghai, China  |
| Tricine-SDS-PAGE gel preparation kit                  | Leagene Biotechnology                                 | Beijing, China   |
| Sodium dodecyl sulfate (SDS)                          | Meilunbio                                             | Dalian, China    |
| Tris                                                  | Biotopped                                             | Beijing, China   |
| Glycine                                               | Biosharp                                              | Beijing, China   |
| Methanol                                              | FUYU CHEMICAL                                         | Tianjin, China   |
| Polyvinylidene fluoride (PVDF) membrane (0.45 μm)     | Merck Millipore Ltd.                                  | Ireland          |
| BD Difco Skim Milk                                    | BD Difco                                              | USA              |
| Western primary antibody diluent                      | SparkJade                                             | Shandong, China  |
| Western Luminescent Solution                          | Biosharp                                              | Beijing, China   |
| Coomassie blue staining solution                      | Beyotime Biotechnology                                | Shanghai, China  |
| Anti-GAPDH (rabbit)                                   | ZEN-BIOSCIENCE                                        | Chengdu, China   |
| Anti-PCNA (rabbit)                                    | ColorfulGene Biological Technology                    | Wuhan, China     |
| Anti-Cyclin D1 (rabbit)                               | ColorfulGene Biological Technology                    | Wuhan, China     |
| Anti-Pax7 (rabbit)                                    | Bioss                                                 | Beijing, China   |
| Anti-Myf5 (rabbit)                                    | ABclonal                                              | Wuhan, China     |
| Anti-SVCT2 (rabbit)                                   | Proteintech                                           | Wuhan, China     |
| Anti-MuRF1 (rabbit)                                   | ColorfulGene Biological Technology                    | Wuhan, China     |
| HRP Goat Anti-Rabbit IgG                              | ABclonal                                              | Wuhan, China     |
| Tween-20                                              | Alphabio Life sciences                                | Tianjin, China   |
| Polyethylenimine Linear (PEI) MW40000                 | Yeasen Biotechnology Co., Ltd.                        | Shanghai, China  |
| His-Bind Purification Kit                             | Millipore                                             | Billerica, USA   |
| ultrafiltration tube (50kDa)                          | Millipore                                             | Germany          |
| Endo-free Plasmid Mini Kit                            | Omega                                                 | Georgia, USA     |
| Yeast extract                                         | OXOID                                                 | Basingstoke, UK  |
| Tryptone                                              | OXOID                                                 | Basingstoke, UK  |
| Beef extract                                          | AOBOX Biotechnology                                   | Beijing, China   |
| NaCl                                                  | Sigma-Aldrich                                         | Shanghai, China  |
| KCl                                                   | Biotopped                                             | Beijing, China   |
| KH <sub>2</sub> PO <sub>4</sub>                       | Sigma                                                 | Shanghai, China  |
| Na <sub>2</sub> HPO <sub>4</sub> ·12 H <sub>2</sub> O | Meilunbio                                             | Dalian, China    |
| Penicillin                                            | Hapharm group CO.,LTD.                                | Harbin, China    |
| Streptomycin                                          | Hapharm group CO.,LTD.                                | Harbin, China    |
| D-(+)-Glucose                                         | Sigma-Vetec                                           | Shanghai, China  |
| ICR mice                                              | Changchun Yisi Laboratory Animal Technology Co., LTD. | Changchun, China |
| Bupivacaine hydrochloride (BH)                        | Yuanye Biological Technology                          | Shanghai, China  |
| 4% paraformaldehyde                                   | Biosharp                                              | Beijing, China   |
| Xylene                                                | FUYU CHEMICAL                                         | Tianjin, China   |
| Sliced paraffin                                       | Biosharp                                              | Beijing, China   |
| Hematoxylin-eosin Staining Kit                        | Solarbio Life Sciences                                | Beijing, China   |
| nuclear Protein Extraction Kit                        | Solarbio Life Sciences                                | Beijing, China   |
| DAB color kit (20×)                                   | ZSGB-BIO                                              | Beijing, China   |
| Sodium citrate antigen repair solution (50×)          | Beyotime Biotechnology                                | Shanghai, China  |
| BCA Protein Assay Kit                                 | Meilunbio                                             | Dalian, China    |
| Neutral balsam                                        | Solarbio Life Sciences                                | Beijing, China   |
| Triton X-100                                          | Solarbio Life Sciences                                | Beijing, China   |
| Mouse Vitamin C (VC) ELISA Kit                        | Abbkine Wuhan Biotechnology Co., LTD                  | Wuhan, China     |
| Anti-fluorescence quencher                            | Beyotime Biotechnology                                | Shanghai, China  |
